# Supplementary material
Source: PubMed Central journal article supplement (PMC3229661)
Supplement: NIHMS325384-supplement-3.pdf [file NIHMS325384-supplement-3.pdf]

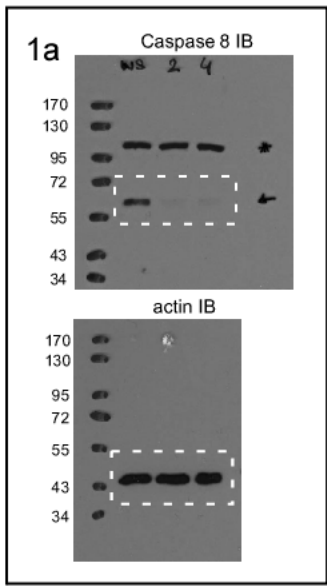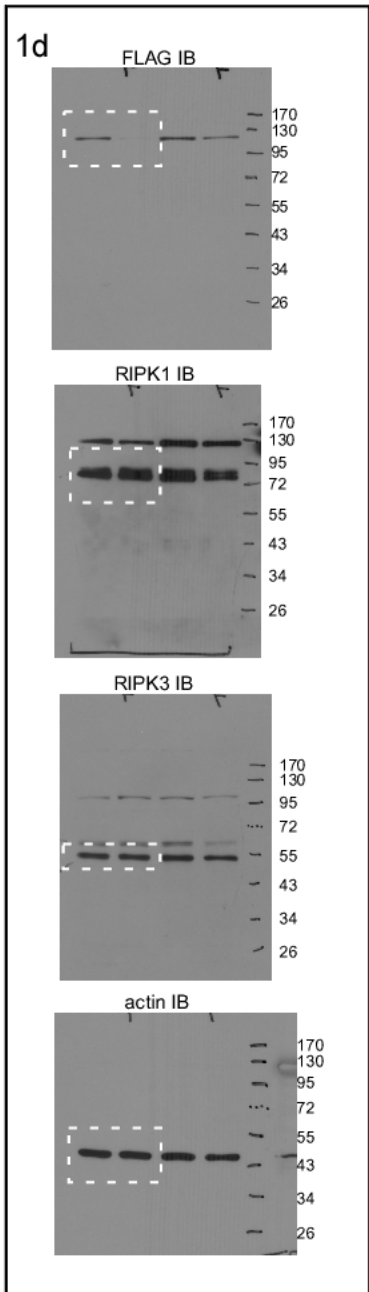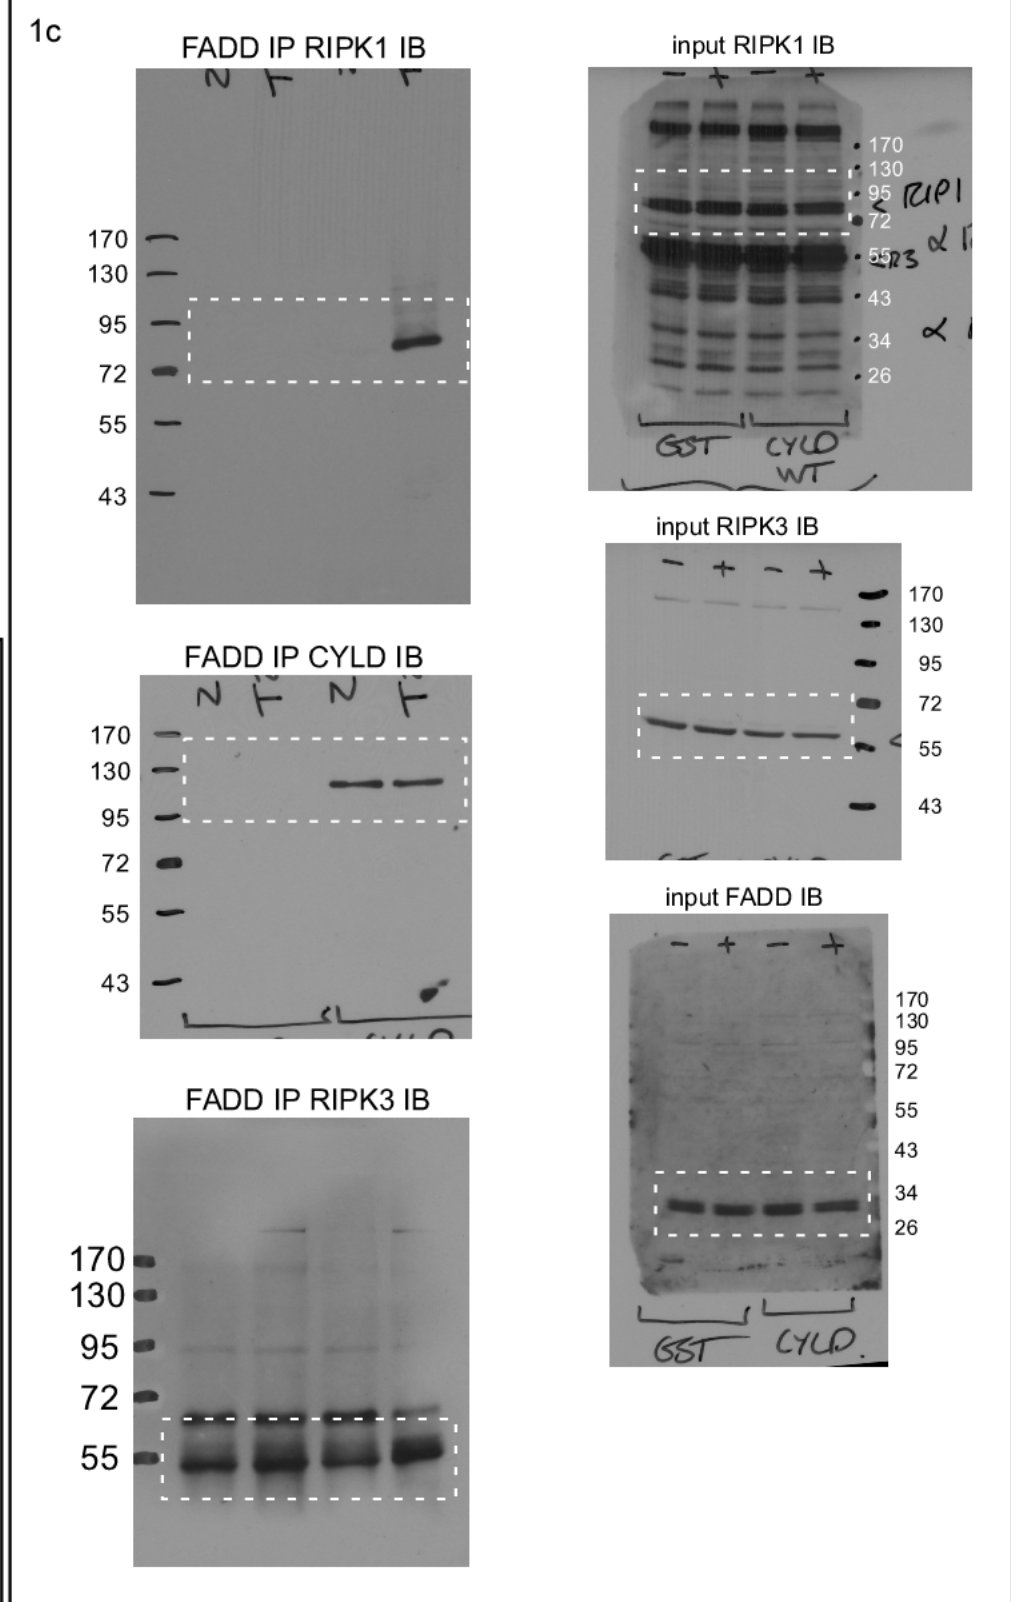

Supplementary Figure 7: Full scan of blots corresponding to those shown in Figure 1.

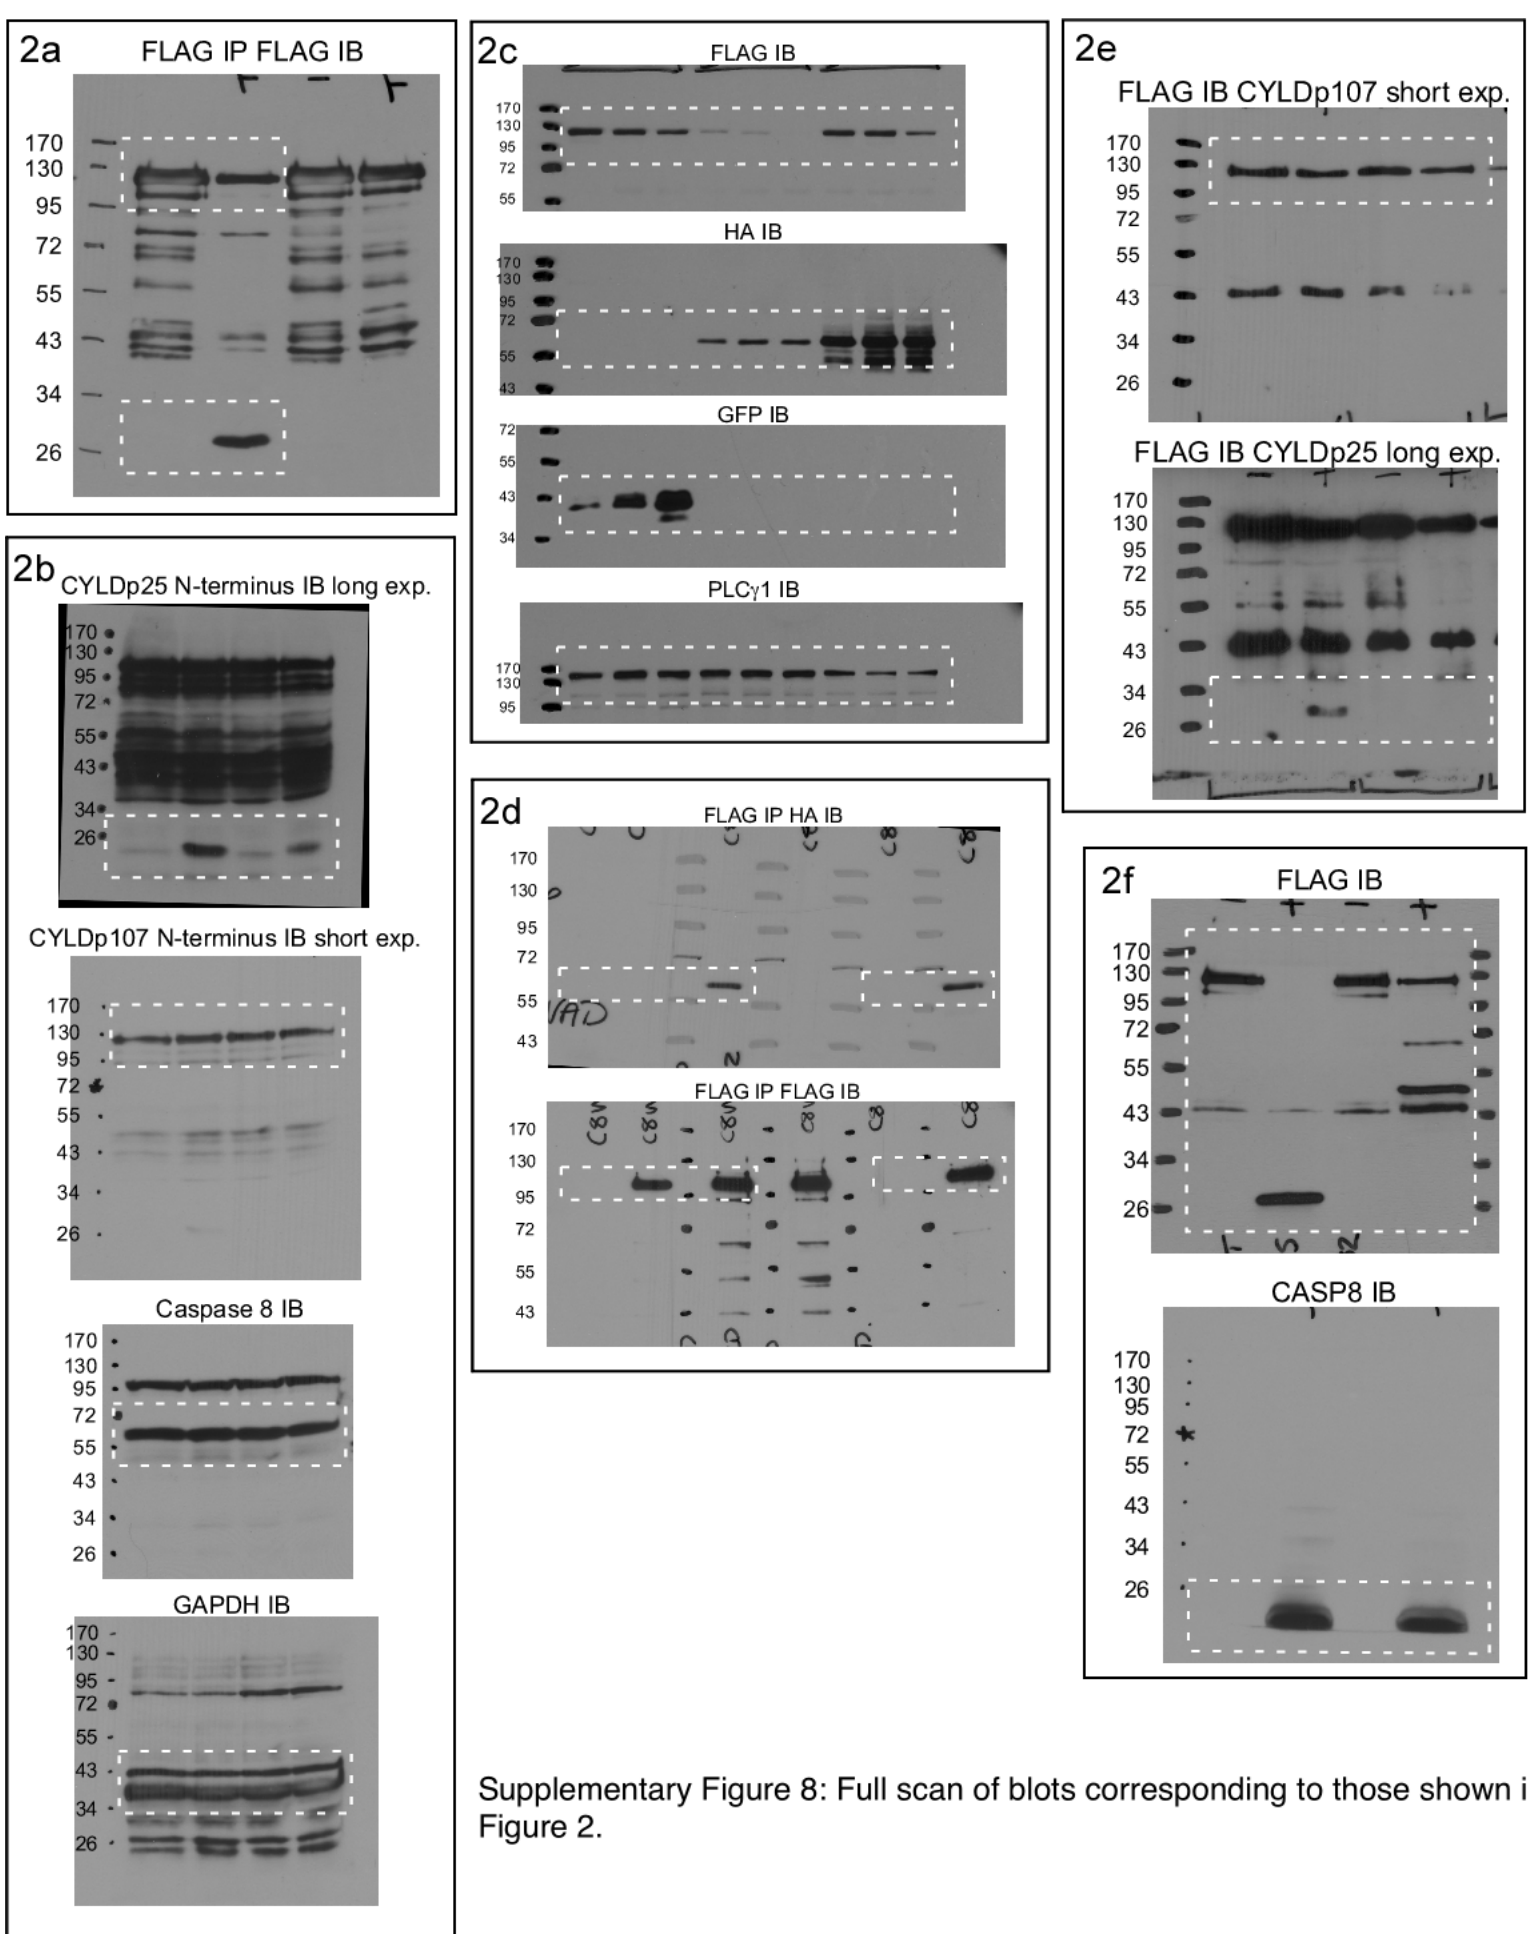

Supplementary Figure 8: Full scan of blots corresponding to those shown in Figure 2.

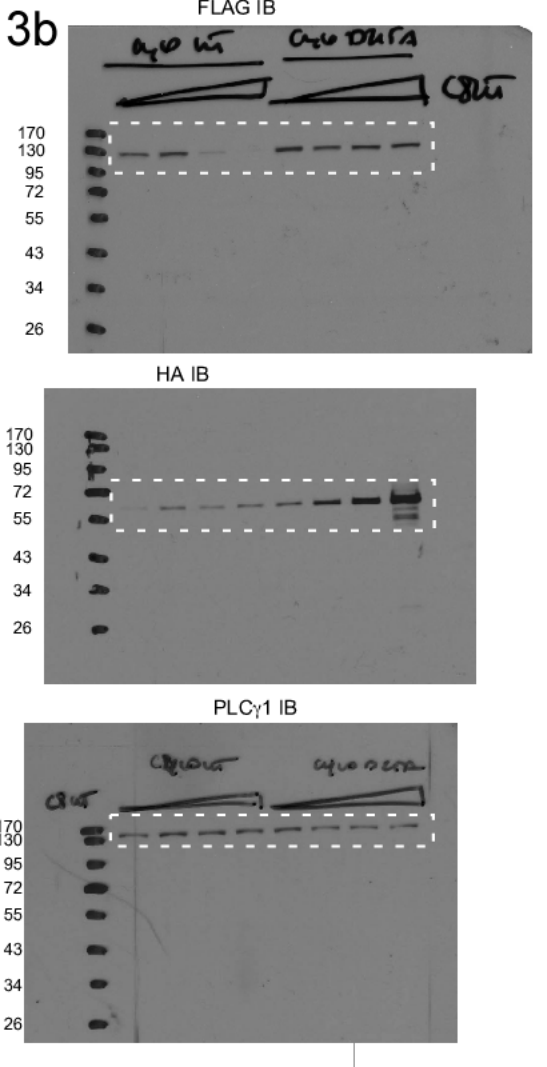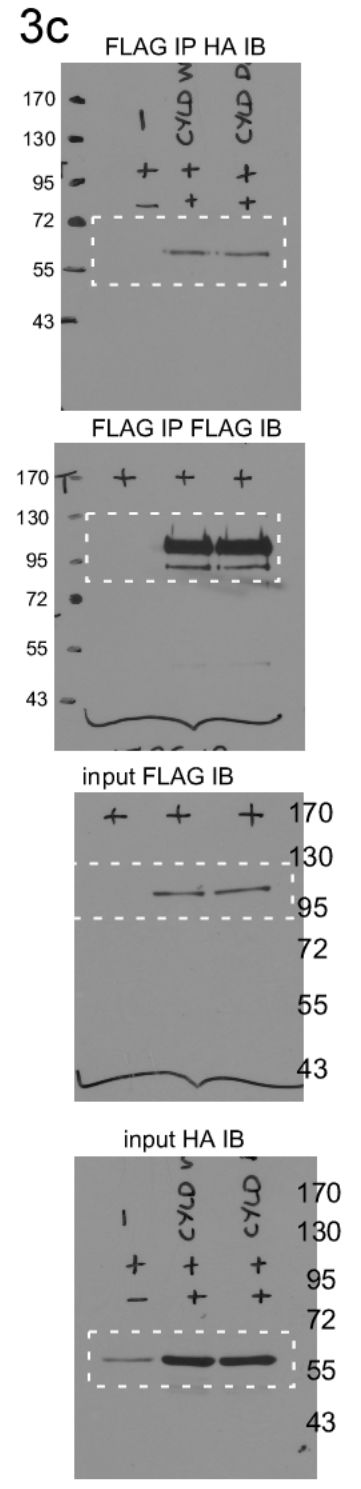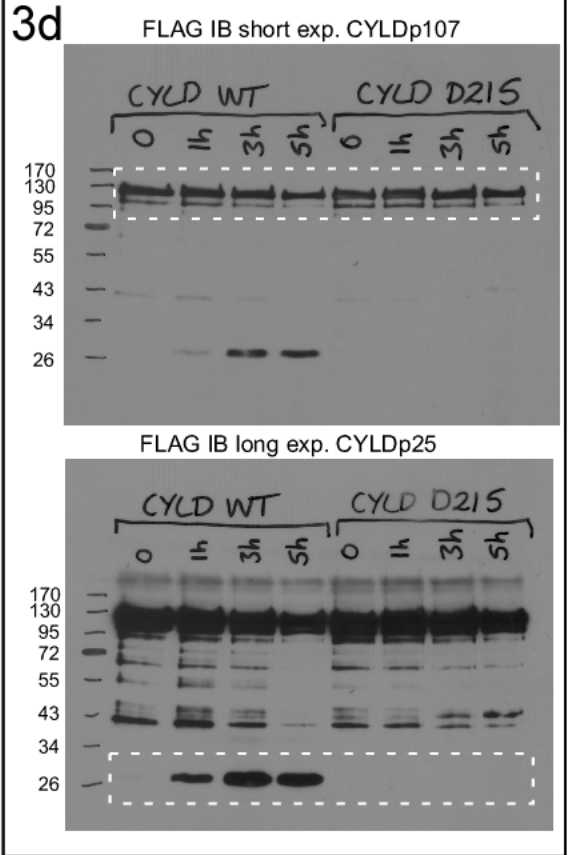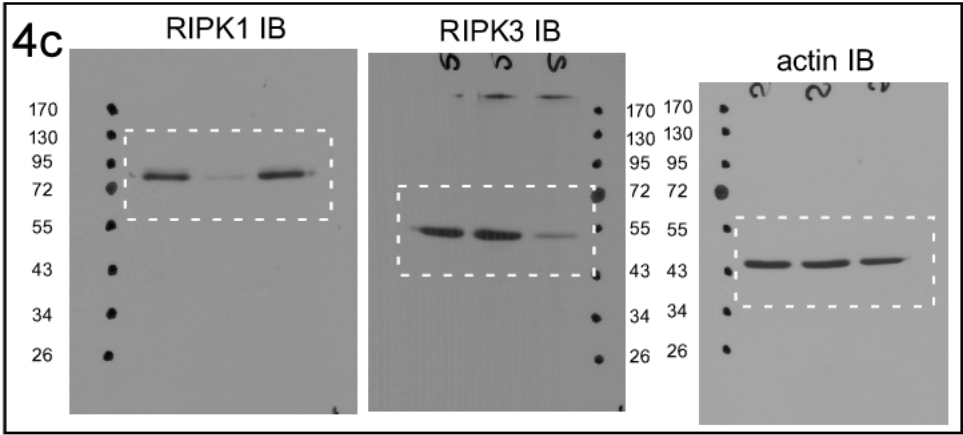

Supplementary Figure 9: Full scan of blots corresponding to those shown in Figures 3 & 4.

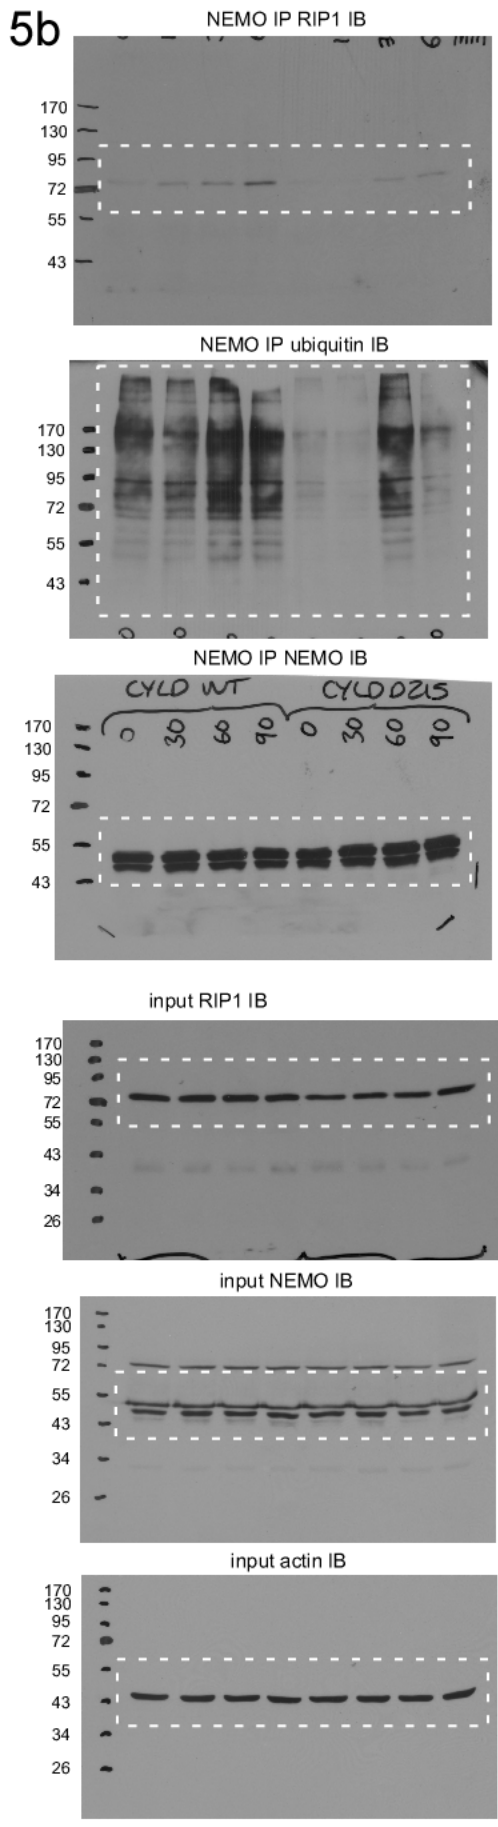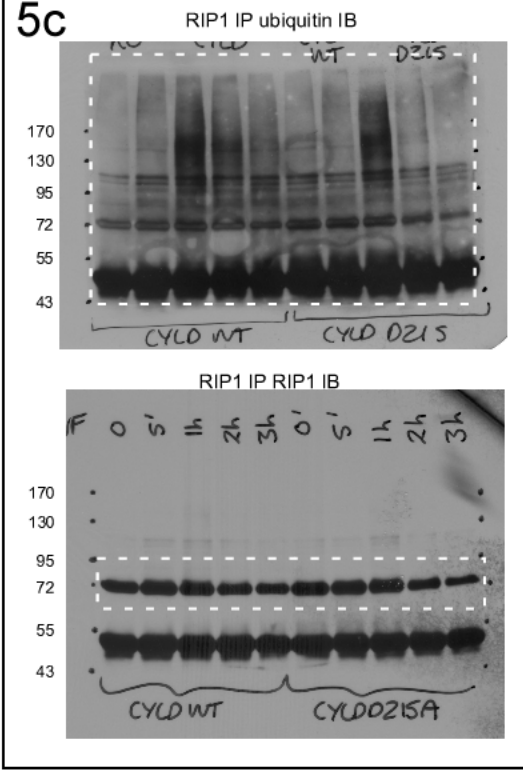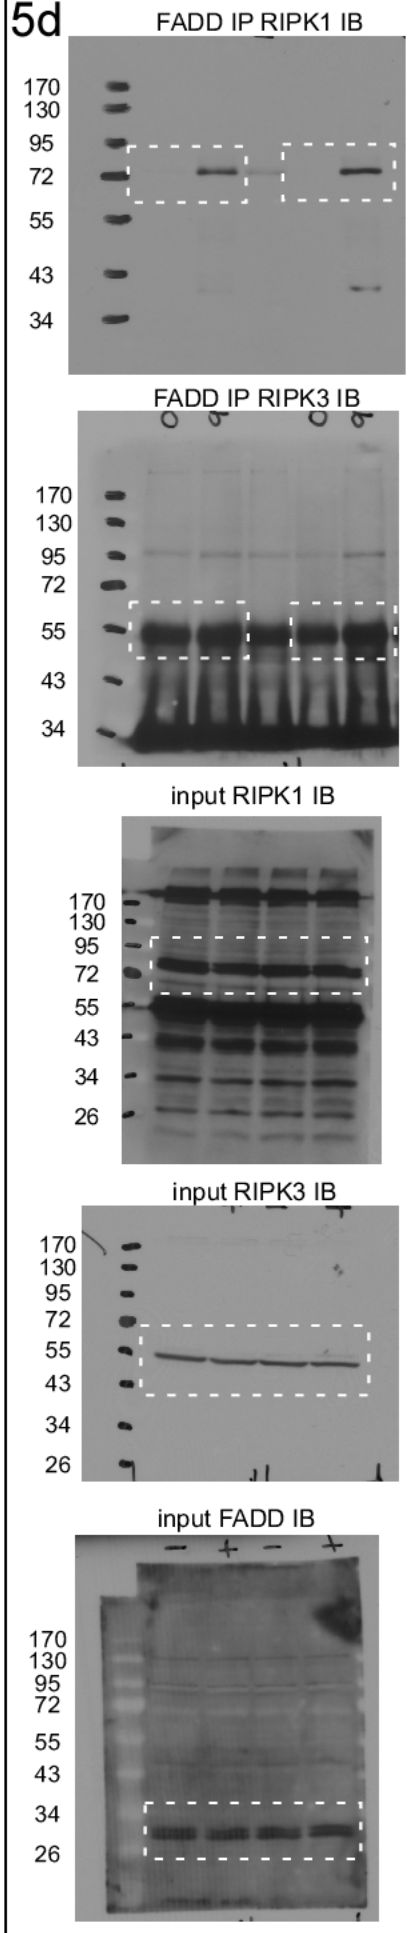

Supplementary Figure 10: Full scan of blots corresponding to those shown in Figure 5.
